# Supplementary material for: Short-term high-fat diet favors the appearances of apoptosis and gliosis by activation of ERK1/2/p38MAPK pathways in brain
Source: publisher site journal article supplement (doi:10.18632/aging.203607), 2021-10-07
Supplement: Supplementary file [file aging-v13i19-203607-supplementary-material-SD1.pdf]

## SUPPLEMENTARY FIGURE

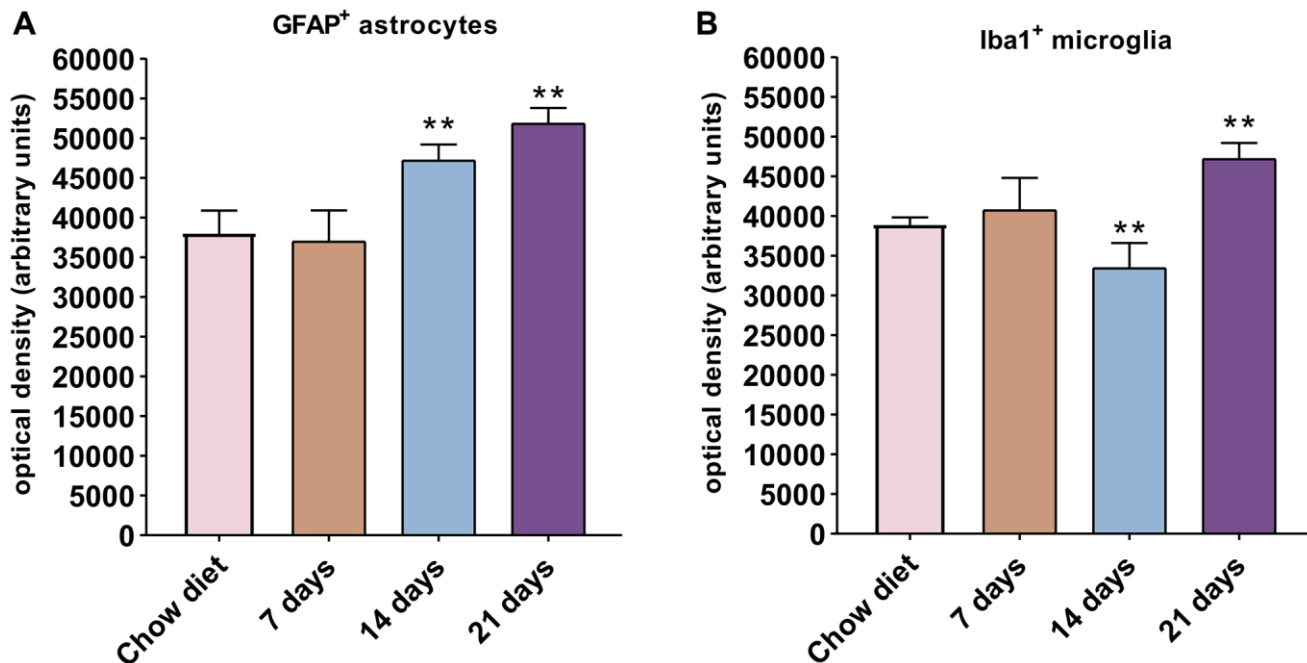

**Supplementary Figure 1.** Quantitation optical density of GFAP<sup>+</sup> astrocytes (A) and Iba1<sup>+</sup> microglia (B) staining of mice fed chow diet and high fat diet in different time points. The images (2–3 sections per animal) were captured and quantified using the NIH Image J software package. \* $p < 0.01$  versus the chow diet fed control group.
